# Supplementary material for: Inflammatory and Metabolic Biomarker Assessment in a Randomized Presurgical Trial of Curcumin and Anthocyanin Supplements in Patients with Colorectal Adenomas
Source: MDPI journal article supplement (doi:10.3390/nu15183894), 2023-09-07

## Supplementary Materials

Supplementary Figure S1. Univariate analysis of IL-10 changes by BMI

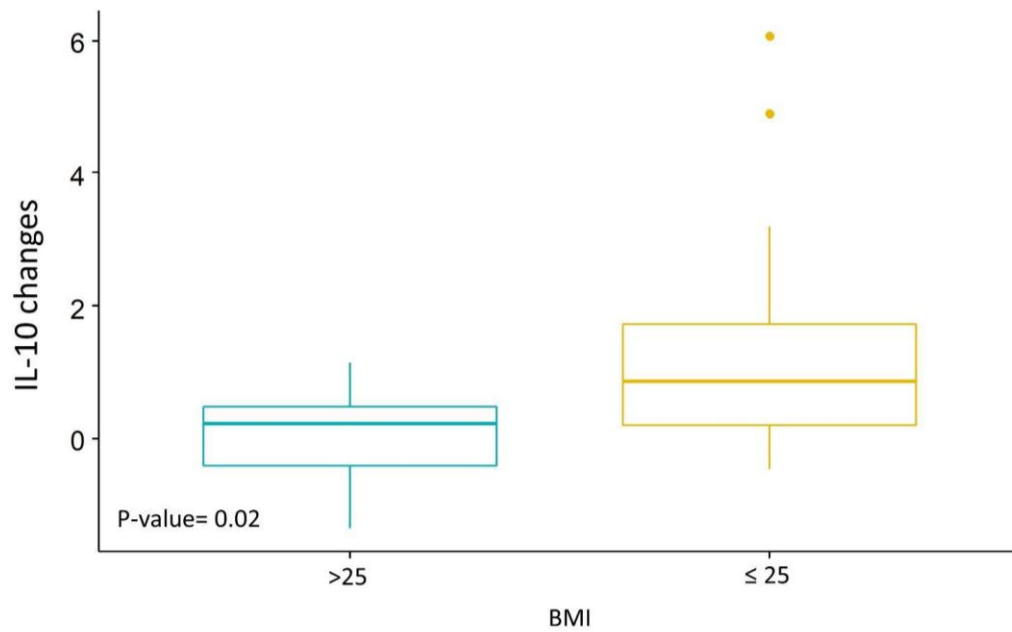

Supplementary Figure S2. Univariate analysis of leptin changes by dietary anthocyanin intake

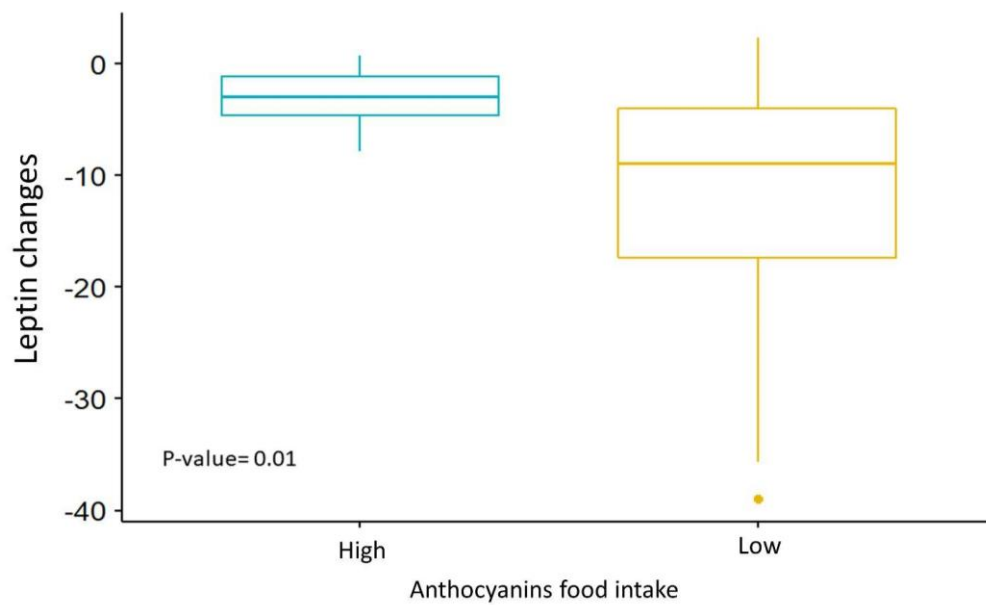

Supplementary Figure S3. Mixed models analysis of post-intervention IGFBP-3 by colorectal cancer family history

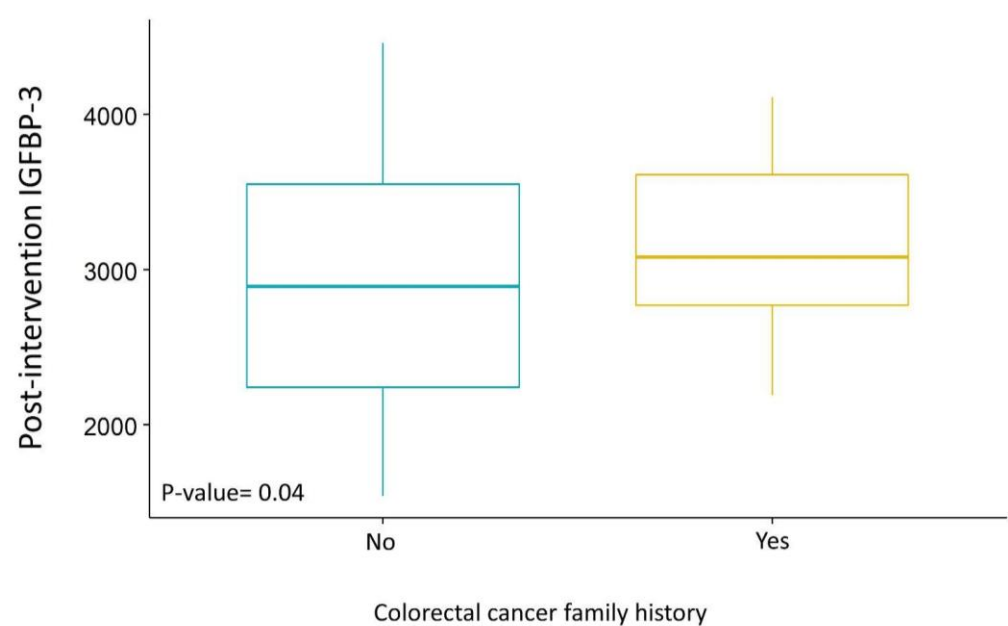

Supplementary Figure S4. Mixed models analysis of adiponectin by treatment arm

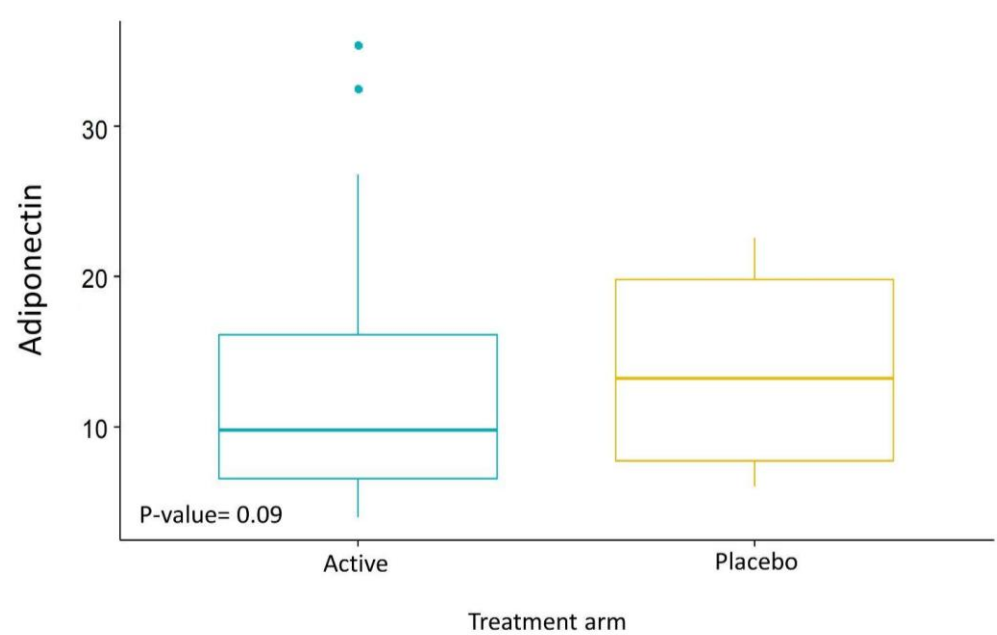

Supplement: s1 [file s1]
